# Supplementary material for: Colorimetric and fluorescent detection of synthetic cathinones in oral fluid with meso-aryl BODIPYs and Cu(ii)
Source: Royal Society of Chemistry journal article supplement (doi:10.1039/d2ra05188e), 2022-01-01
Supplement: d2ra05188e1.pdf [file d2ra05188e1.pdf]

## Supplementary Information

### Colorimetric and fluorescent detection of synthetic cathinones in oral fluid with meso-aryl BODIPYs and Cu(II)

Jordi Hernández-Contreras,<sup>a</sup> Margarita Parra,<sup>a,b,c</sup> Salvador Gil,<sup>a,b,c</sup> Ana M. Costero,<sup>a,b,c</sup> Pau Arroyo,<sup>a,b</sup> Félix Sancenón,<sup>a,c,d</sup> Ramón Martínez-Máñez,<sup>a,c,d</sup> José A. Sáez <sup>\*a,b</sup> and Pablo Gaviña<sup>\*a,b,c</sup>

#### Contents

|                                                                                                                                                                                                                                                                                                                                      |          |
|--------------------------------------------------------------------------------------------------------------------------------------------------------------------------------------------------------------------------------------------------------------------------------------------------------------------------------------|----------|
| <b>Table S1.</b> Comparison of the sensing properties of different optical selective probes for synthetic cathinones (SCs) .....                                                                                                                                                                                                     | <b>3</b> |
| <b>Figure S1.</b> <sup>1</sup> H NMR of compound <b>1</b> in CDCl <sub>3</sub> .....                                                                                                                                                                                                                                                 | <b>4</b> |
| <b>Figure S2.</b> <sup>13</sup> C NMR of compound <b>1</b> in CDCl <sub>3</sub> .....                                                                                                                                                                                                                                                | <b>4</b> |
| <b>Figure S3.</b> <sup>1</sup> H NMR of compound <b>2</b> in CDCl <sub>3</sub> .....                                                                                                                                                                                                                                                 | <b>5</b> |
| <b>Figure S4.</b> <sup>13</sup> C NMR of compound <b>2</b> in CDCl <sub>3</sub> .....                                                                                                                                                                                                                                                | <b>5</b> |
| <b>Figure S5.</b> Mass spectroscopy data of compound <b>1</b> +Cu(I) after reflux heating for 2 minutes. ....                                                                                                                                                                                                                        | <b>6</b> |
| <b>Figure S6.</b> Mass spectroscopy data of compound <b>2</b> +Cu(I) after reflux heating for 2 minutes. ....                                                                                                                                                                                                                        | <b>6</b> |
| <b>Figure S7.</b> UV-vis and fluorescence emission ( $\lambda_{em}$ = 515 nm; $\lambda_{exc}$ = 450 nm) spectra of compound <b>1</b> (50 $\mu$ M in THF: water 95:5 solution) with 1 equiv. of Cu(AcO) <sub>2</sub> in presence of 2 equiv. of ephedrone after reflux heating for 2 minutes .....                                    | <b>7</b> |
| <b>Figure S8.</b> Fluorescence emission calibration curve at 515 nm of water samples spiked with cathinone ( $\lambda_{exc}$ = 450 nm).....                                                                                                                                                                                          | <b>7</b> |
| <b>Figure S9.</b> Evolution of the absorption at 501 nm and fluorescence emission at 515 nm ( $\lambda_{exc}$ = 450 nm) over time of a mixture of compound <b>2</b> (50 $\mu$ M in THF: water 95:5 solution) and 1 equiv. of Cu(AcO) <sub>2</sub> or 1 equiv. of CuBr. In each case, the solution was refluxed for 2.5 minutes. .... | <b>8</b> |
| <b>Figure S10.</b> UV-vis and emission spectra ( $\lambda_{exc}$ = 450 nm) of compound <b>1</b> (50 $\mu$ M in THF: water 95:5) with 1 equiv. of Cu(AcO) <sub>2</sub> (blank) and the same solution in presence of 2 equiv. of the corresponding interferent. In each case, the solution was refluxed for 2 minutes. ....            | <b>8</b> |

**Figure S11.** UV-vis and emission spectra ( $\lambda_{\text{exc}} = 450 \text{ nm}$ ) of compound **1** (50  $\mu\text{M}$  in THF: water 95:5) with 1 equiv. of  $\text{Cu}(\text{AcO})_2$  (blank) and the same solution in presence of 2 equiv. of the corresponding cathinone. In each case, the solution was refluxed for 2 minutes. .... **9**

**Table S2.** Recovery and accuracy of the method to detect cathinone in saliva samples (computed according to reference K. A. Rawat, R. K. Singhal, S. K. Kailasa, RSC Adv. 6 (2016) 32025-32036)..... **9**

**Table S1.** Comparison of the sensing properties of different optical selective probes for synthetic cathinones (SCs).

| Probe                       | Detection technique          | Selectivity          | Limit of detection      | Application                | Reference                     |
|-----------------------------|------------------------------|----------------------|-------------------------|----------------------------|-------------------------------|
| BODIPY derivative           | Fluorescence "turn off"      | Synthetic cathinones | 0.16 $\mu$ M (32 ng/mL) | Aqueous media and saliva   | This study                    |
| Molecular imprinted polymer | Aggregation-induced Emission | Synthetic cathinones | 0.34 $\mu$ M            | Urine                      | Shen <i>et al.</i> , 2022     |
| BSA – Au nanoclusters       | Fluorescence "turn off"      | Synthetic cathinones | 0.14 mM                 | Aqueous media              | Yao-Te <i>et al.</i> , 2019   |
| Carbon dots (C-dots)        | Fluorescence "turn off"      | Synthetic cathinones | 1.74 mM                 | Aqueous media              | Yao-Te <i>et al.</i> , 2019   |
| CBS - Azyme                 | Fluorescence "turn on"       | Synthetic cathinones | 3 $\mu$ M               | Saliva (50 %) Urine (50 %) | Yingping <i>et al.</i> , 2019 |
| -                           | GC-MS method                 | Synthetic cathinones | 10 ng/mL                | Saliva                     | Khaled <i>et al.</i> , 2016   |

Y. Yan, L. Jiang, S. Zhang, X. Shen, C. Huang, Specific "light-up" sensor made easy: An aggregation induced emission monomer for molecular imprinting, *Biosensors and Bioelectronics* 205 (2022) 114113. DOI: [10.1016/j.bios.2022.114113](https://doi.org/10.1016/j.bios.2022.114113)

Y.-T. Yen, T.-Y. Chen, C.-Y. Chen, C.-L. Chang, S.-C. Chyueh, H.-T. Chang, Photoluminescent Colorimetric Probe of Bovine Serum Albumin-Stabilized Gold Nanoclusters for New Psychoactive Substances: Cathinone Drugs in Seized Street Samples, *Sensors* 19 (2019) 3554. DOI: [10.3390/s19163554](https://doi.org/10.3390/s19163554)

Y.-T. Yen, Y.-S. Lin, T.-Y. Chen, S.-C. Chyueh, H.-T. Chang, Carbon dots functionalized papers for high-throughput sensing of 4-chloroethcathinone and its analogues in crime sites, *R. Soc. open sci.* 6 (2019) 191017. DOI: [10.1098/rsos.191017](https://doi.org/10.1098/rsos.191017)

Y. Luo, H. Yu, O. Alkhamis, Y. Liu, X. Lou, B. Yu, Y. Xiao, Label-Free, Visual Detection of Small Molecules Using Highly Target-Responsive Multimodule Split Aptamer Constructs, *Anal. Chem.* 91 (2019) 7199–7207. DOI: [10.1021/acs.analchem.9b00507](https://doi.org/10.1021/acs.analchem.9b00507)

Khaled. M, Abtehaj. H, Alanoud. M, El-Said. A, A GC–MS Method for Detection and Quantification of Cathine, Cathinone, Methcathinone and Ephedrine in Oral Fluid, *J. Chromatogr. Sci.*, 54, 8 (2016) 1271-1276. DOI: [10.1093/chromsci/bmw082](https://doi.org/10.1093/chromsci/bmw082)

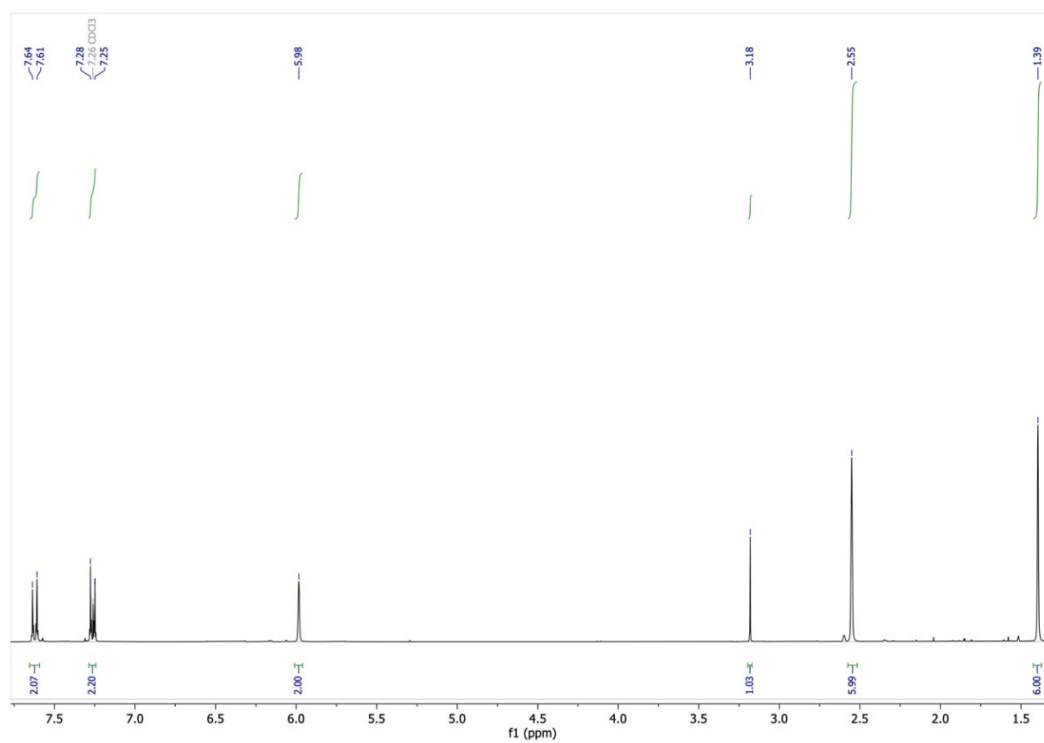

**Figure S1.** <sup>1</sup>H NMR of compound **1** in CDCl<sub>3</sub>.

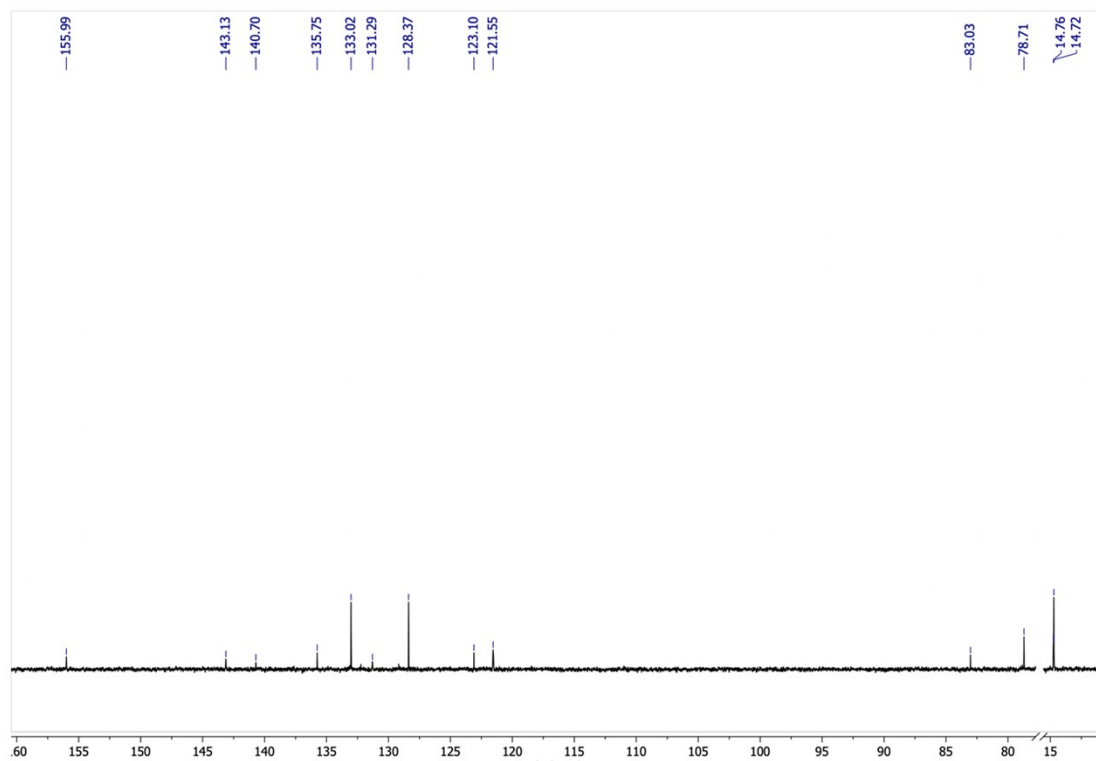

**Figure S2.** <sup>13</sup>C NMR of compound **1** in CDCl<sub>3</sub>.

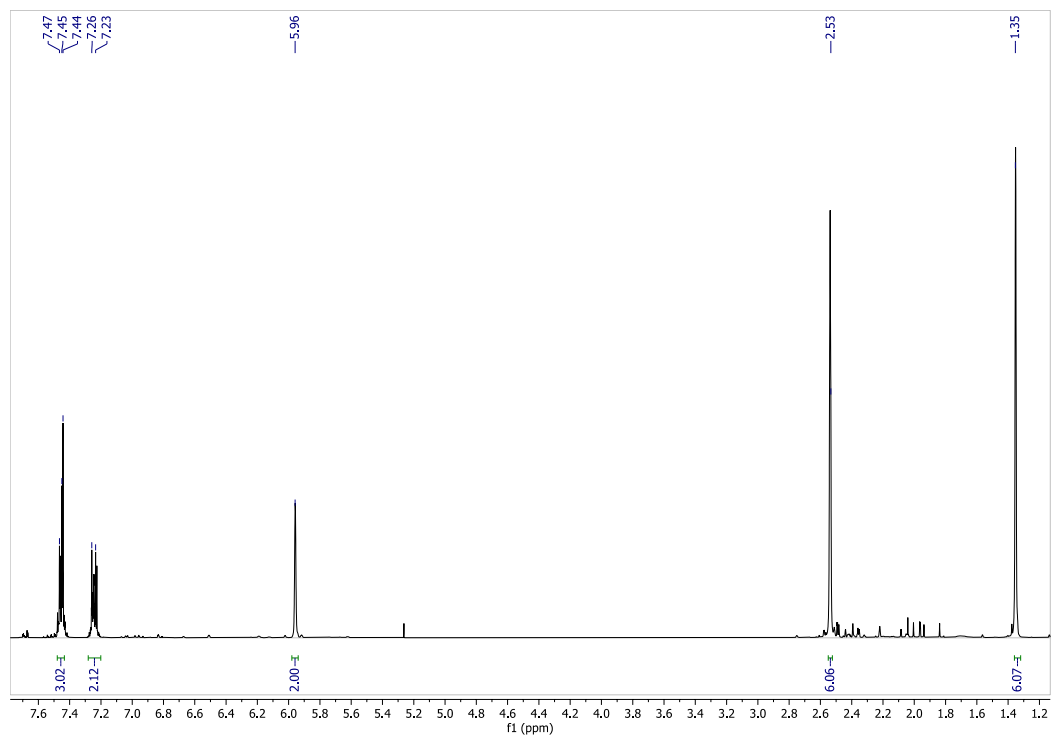

**Figure S3.** <sup>1</sup>H NMR of compound **2** in CDCl<sub>3</sub>.

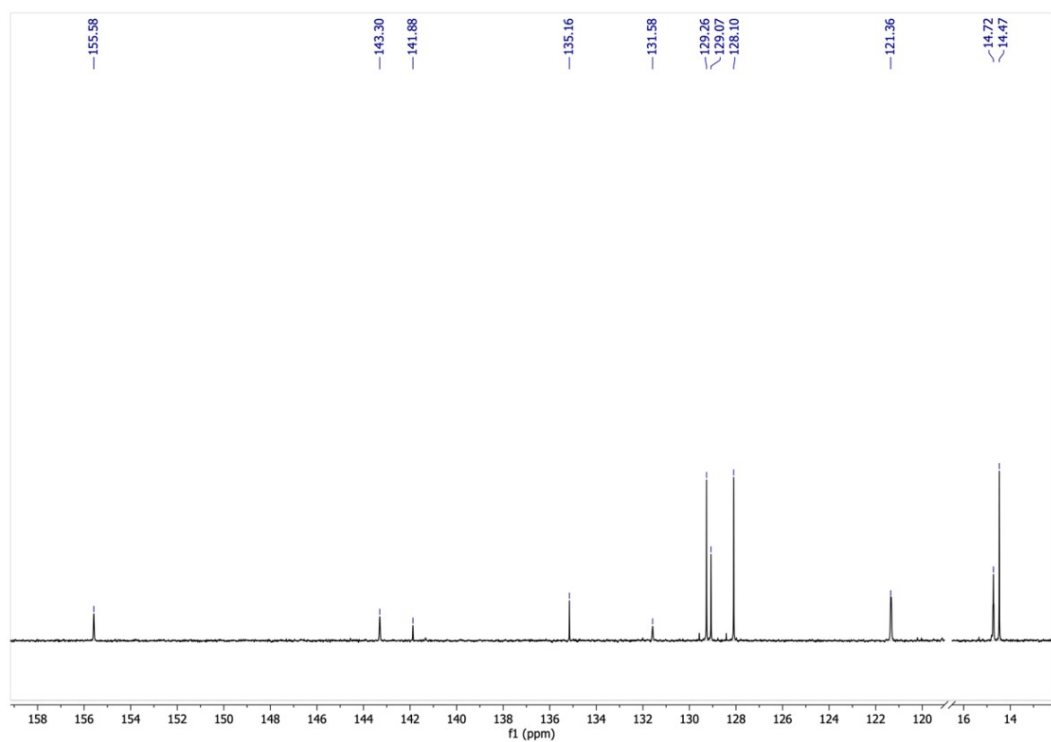

**Figure S4.** <sup>13</sup>C NMR of compound **2** in CDCl<sub>3</sub>.

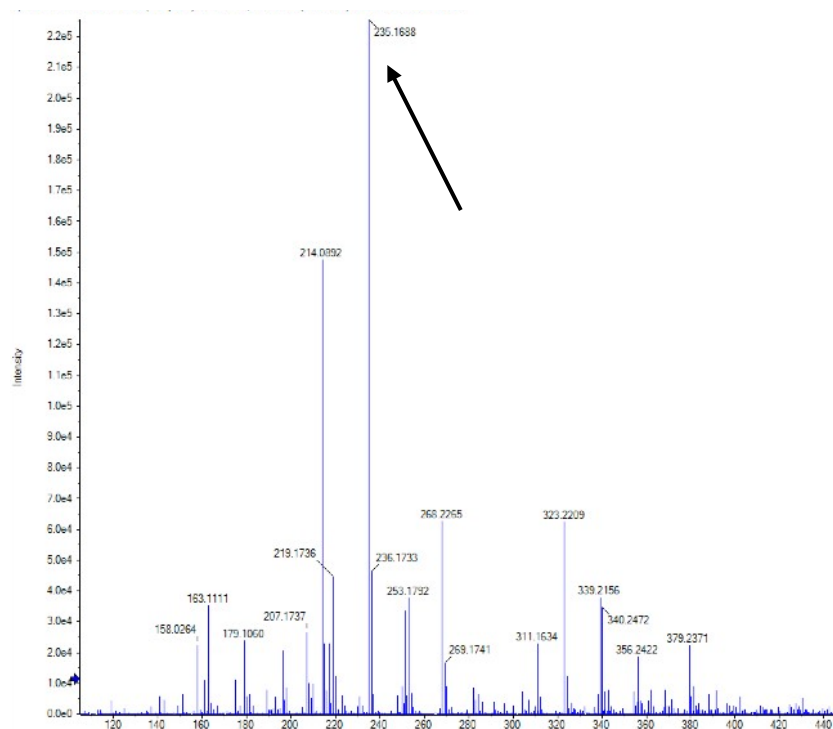

**Figure S5.** Mass spectroscopy data of compound **1**+Cu(I) after reflux heating for 2 minutes.

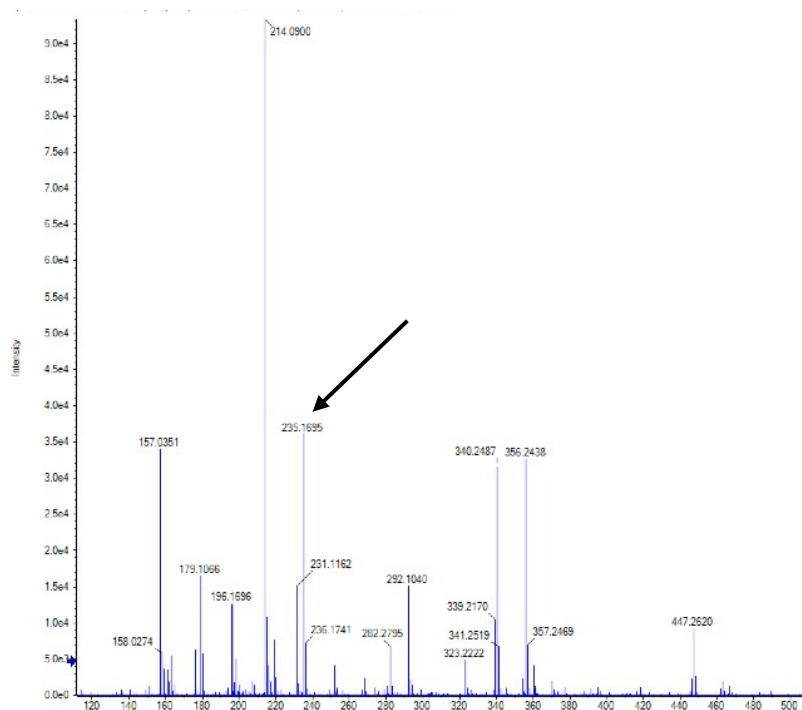

**Figure S6.** Mass spectroscopy data of compound **2**+Cu(I) after reflux heating for 2 minutes.

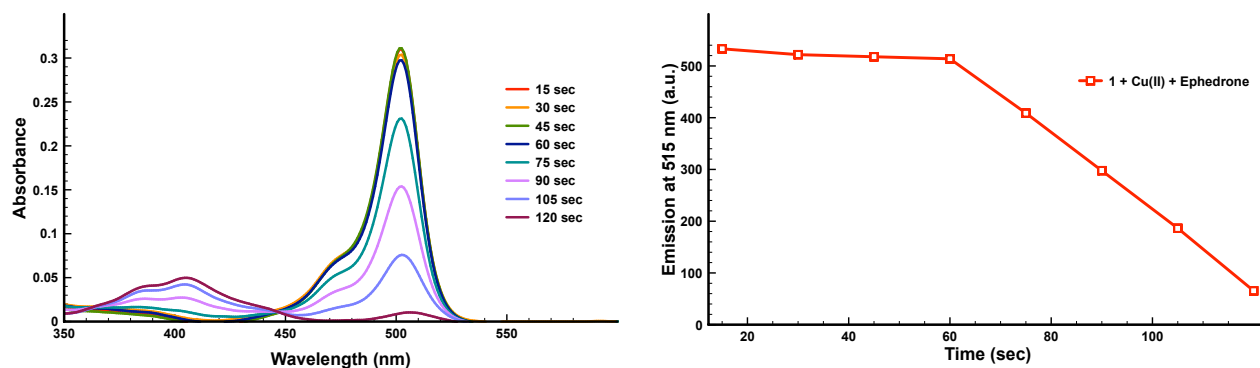

**Figure S7.** UV-vis (left) and fluorescence (right) emission ( $\lambda_{em} = 515$  nm;  $\lambda_{exc} = 450$  nm) spectra of compound **1** (50  $\mu$ M in THF: water 95:5 solution) with 1 equiv. of  $\text{Cu}(\text{AcO})_2$  in presence of 2 equiv. of ephedrone after reflux heating for 2 minutes.

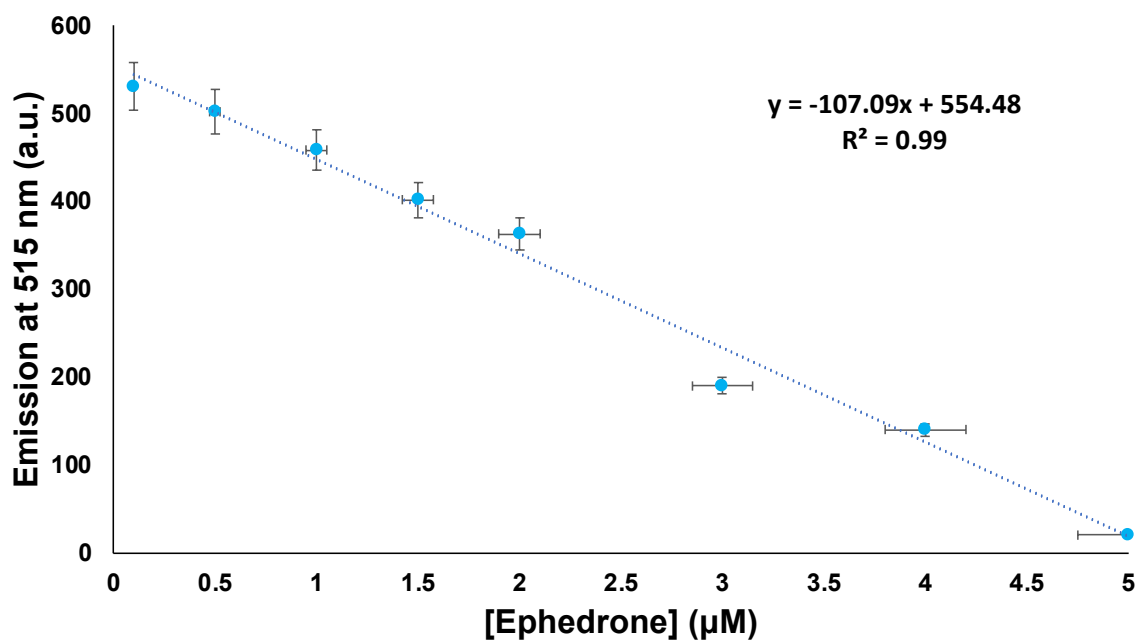

**Figure S8.** Fluorescence emission calibration curve at 515 nm ( $\lambda_{exc} = 450$  nm) of water samples spiked with cathinone (0.15 to 5  $\mu$ M).

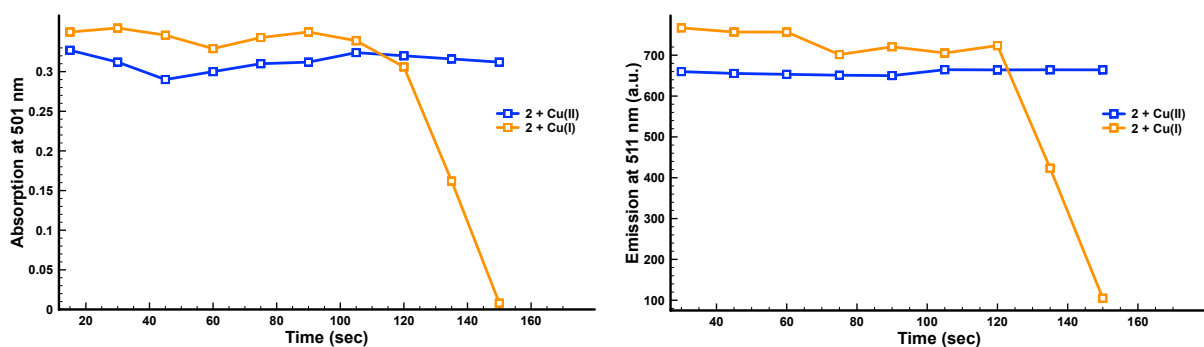

**Figure S9.** Evolution of the absorption at 501 nm (left) and fluorescence emission (right) at 515 nm ( $\lambda_{\text{exc}} = 450$  nm) over time of a mixture of compound **2** (50  $\mu\text{M}$  in THF: water 95:5 solution) and 1 equiv. of  $\text{Cu}(\text{AcO})_2$  or 1 equiv. of  $\text{CuBr}$ . In each case, the solution was refluxed for 2.5 minutes.

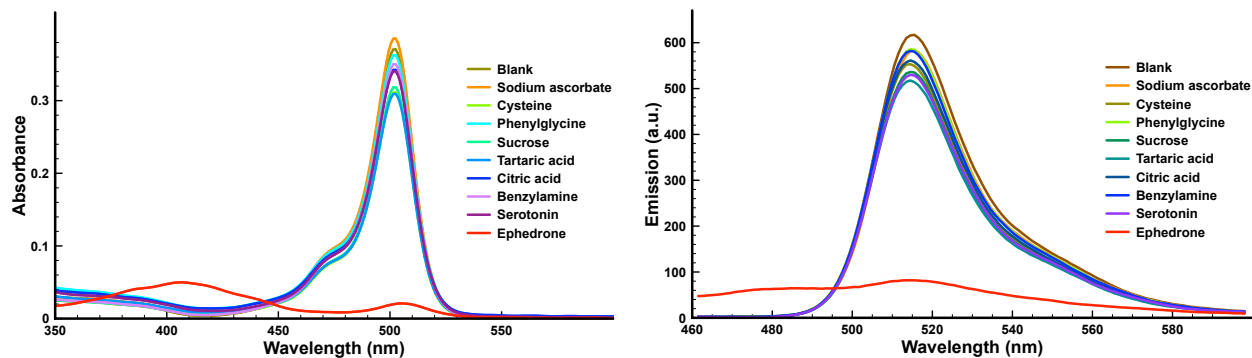

**Figure S10.** UV-vis (left) and emission spectra (right,  $\lambda_{\text{exc}} = 450$  nm) of compound **1** (50  $\mu\text{M}$  in THF: water 95:5) with 1 equiv. of  $\text{Cu}(\text{AcO})_2$  (blank) and the same solution in presence of 2 equiv. of the corresponding interferent. In each case, the solution was refluxed for 2 minutes.



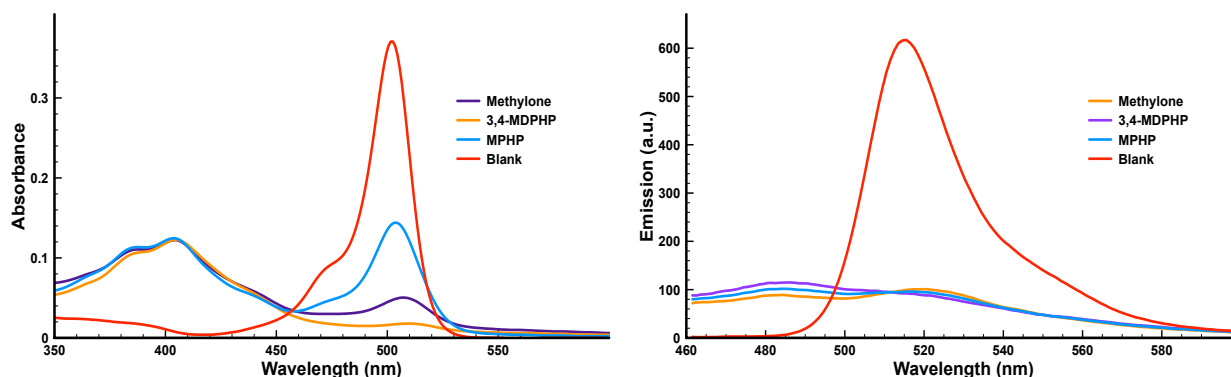

**Figure S11.** UV-vis (left) and emission spectra (right,  $\lambda_{\text{exc}} = 450 \text{ nm}$ ) of compound **1** ( $50 \mu\text{M}$  in THF: water 95:5) with 1 equiv. of  $\text{Cu}(\text{AcO})_2$  (blank) and the same solution in presence of 2 equiv. of the corresponding cathinone. In each case, the solution was refluxed for 2 minutes.

**Table S2.** Recovery and accuracy of the method<sup>1</sup> to detect cathinones in saliva samples.

| Analite               | Known concentration ( $\mu\text{M}$ ) | Found concentration ( $\mu\text{M}$ ) | Recovery (%) <sup>a</sup> | Accuracy (%) <sup>b</sup> |
|-----------------------|---------------------------------------|---------------------------------------|---------------------------|---------------------------|
| Cathinone (Ephedrone) | 0.75                                  | 0.67                                  | 89                        | -11                       |

<sup>a</sup> recovery % (found concentration/known concentration) x 100

<sup>b</sup> accuracy % (found concentration – known concentration/known concentration) x 100

[1] K. A. Rawat, R. K. Singhal, S. K. Kailasa, *RSC Adv.* 6 (2016) 32025-32036.
